# Supplementary material
Source: MDPI journal article supplement (https://www.mdpi.com/2297-8739/9/1/11)
Supplement: s1 [file s1 › separations-1495370-supplementary.pdf]

## Supplementary materials

# A novel and green method for turning food waste into environment-friendly organic deicing salts: the enhanced VFAs production through AnMBR

Qihong Xiang <sup>1</sup>, Kunlun Yang <sup>1,2,3,\*</sup>, Ziwen Chen <sup>1</sup>, Manman Li <sup>1</sup>, Yuanqi Zhang <sup>1</sup>, Xiaorui Wang <sup>1</sup>, Yingying Jiang <sup>1</sup>, Peng Gu <sup>1,2,3</sup>, and Hengfeng Miao <sup>1,2,3,4,\*</sup>

<sup>1</sup>School of Environmental and Civil Engineering, Jiangnan University, Wuxi 214122, P.R. China

<sup>2</sup>Jiangsu Key Laboratory of Anaerobic Biotechnology, Jiangnan University, Wuxi 214122, P.R. China

<sup>3</sup>Jiangsu Engineering Laboratory of Biomass Energy and Carbon Reduction Technology, Jiangnan University, Wuxi 214122, P.R. China

<sup>4</sup>Water Treatment Technology and Material Innovation Center, Suzhou University of Science and Technology, Suzhou 215009, P.R. China

**\* Corresponding author:**

yangkunlun@jiangnan.edu.cn (K.L.Y.), hfmiao@jiangnan.edu.cn (H.F.M).

**Figure S1** Variation of the membrane flux.

**Figure S2** Infrared spectrogram of product.

**Figure S3** XRD spectrogram of product.

**Figure S4** SEM images of product.

**Table S1** The one-way analysis of variance for protease activity under stage I and II.

**Table S2** The one-way analysis of variance for  $\alpha$ -GLC activity under stage I and II.

**Table S3** The one-way analysis of variance for ACK activity under stage I and II.

**Table S4** Ingredients in organic deicing salts.

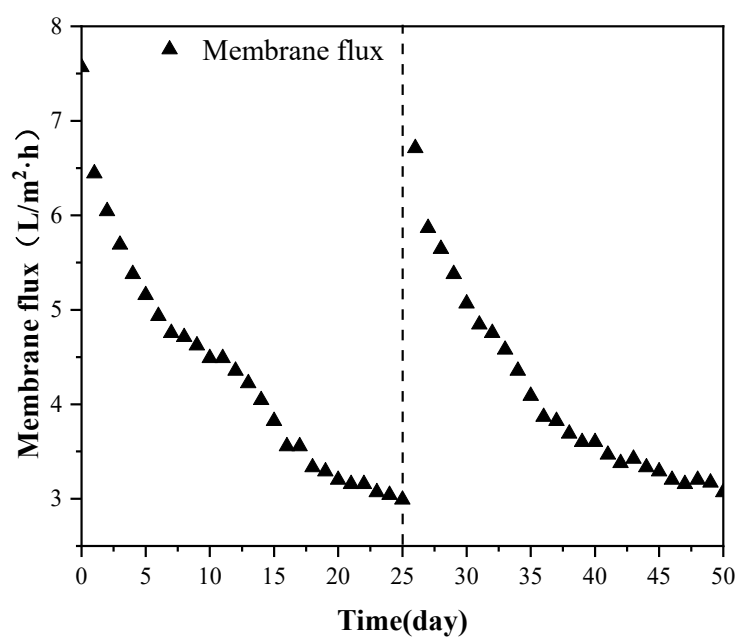

Figure S1 Variation of the membrane flux.

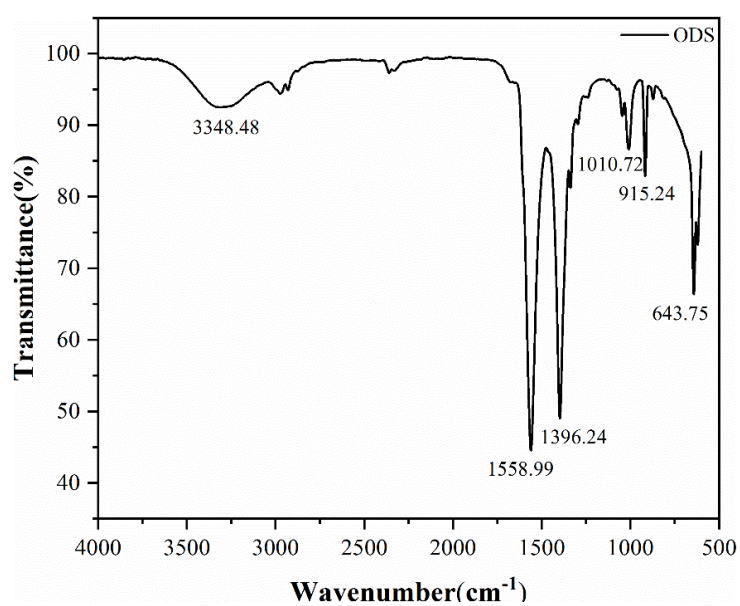

Figure S2 Infrared spectrogram of product.

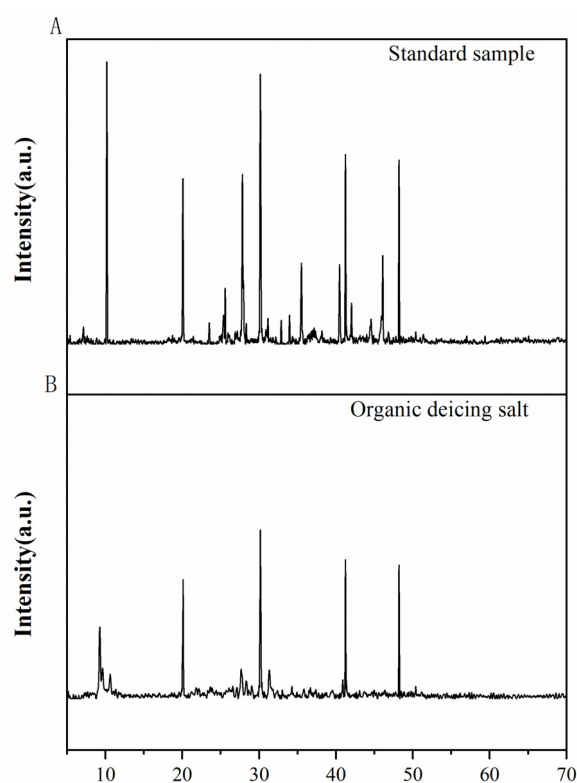

**Figure S3** XRD spectrogram of product.

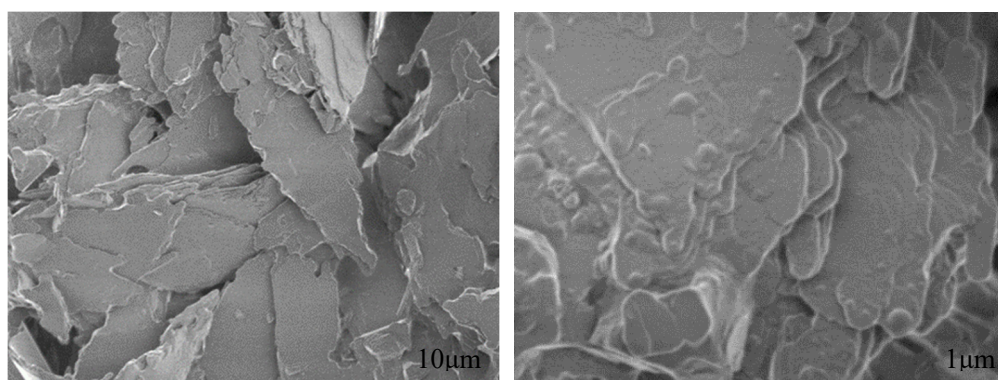

**Figure S4** SEM images of product.

**Table S1** The one-way analysis of variance for protease activity under stage I and II.

| Source         | SS      | df | MS      | F        | P-value  | F crit |
|----------------|---------|----|---------|----------|----------|--------|
| Between Groups | 15.0682 | 1  | 15.0682 | 182.3808 | 1.02E-05 | 5.9873 |
| Within Groups  | 0.4957  | 6  | 0.0826  |          |          |        |
| Total          | 15.5639 | 7  |         |          |          |        |

**Table S2** The one-way analysis of variance for  $\alpha$ -GLC activity under stage I and II.

| Source         | SS     | df | MS     | F     | P-value | F crit |
|----------------|--------|----|--------|-------|---------|--------|
| Between Groups | 0.0245 | 1  | 0.0245 | 77.76 | 2.1E-05 | 5.3176 |
| Within Groups  | 0.0025 | 8  | 0.0003 |       |         |        |
| Total          | 0.0271 | 9  |        |       |         |        |

**Table S3** The one-way analysis of variance for ACK activity under stage I and II.

| Source         | SS        | df | MS        | F        | P-value  | F crit |
|----------------|-----------|----|-----------|----------|----------|--------|
| Between Groups | 3520.5320 | 1  | 3520.5320 | 138.0621 | 2.52E-05 | 5.3176 |
| Within Groups  | 204.0503  | 8  | 25.5063   |          |          |        |
| Total          | 3724.5820 | 9  |           |          |          |        |

**Table S4** Ingredients in organic deicing salts.

| Composition | PA    | PP   | PB    | Protein | Polysaccharide | NH <sub>4</sub> <sup>+</sup> -N | PO <sub>4</sub> <sup>3-</sup> | Others |
|-------------|-------|------|-------|---------|----------------|---------------------------------|-------------------------------|--------|
| Wt (%)      | 71.81 | 8.44 | 15.05 | 1.38    | 0.46           | 1.02                            | 0.14                          | 1.70   |

Note: PA, Potassium acetate; PP, Potassium propionate; PB, Potassium butyrate
